# Supplementary material for: Chloroplast sequence variation and the efficacy of peptide nucleic acids for blocking host amplification in plant microbiome studies
Source: Microbiome. 2018 Aug 18;6:144. doi: 10.1186/s40168-018-0534-0 (PMC6098832; doi:10.1186/s40168-018-0534-0)
Supplement: Supplementary file 3 — R script used for all microbiome bioinformatic and statistical analyses. (R 35 kb) [file 40168_2018_534_MOESM3_ESM.r]

##### PNA analysis #####
# R version = 3.4.2
# libraries
library(ggplot2)
library(phyloseq)
library(dada2)
library(vegan)
library(lme4)
library(lmerTest)
library(DESeq2)
library(genefilter)
library(Biostrings)
library(ape)
library(ade4)
library(Hmisc)
library(plyr)
library(RColorBrewer)
library(geiger)
library(phytools)
library(nlme)
library(MuMIn)
library(dplyr)
library(reshape2)
library(broom)
library(limma)
library(gplots)
library(seqinr)
library(psych)

# functions #
st.err <- function(x) {
  sd(x)/sqrt(length(x))
}


# ggplot theme #
# *** Note: all figures made in R, arranged in Inkscape or Illustrator #
theme.gg<-theme(panel.background = element_rect(fill = "transparent", 
                colour = NA), plot.background = element_rect(colour = 'NA', 
                fill = 'transparent'),panel.grid.major=element_line(color=NA),
                axis.line=element_line(size=1.2,color="black"),
                axis.ticks=element_line(color="black"),
                axis.text=element_text(color="black",size=26),
                axis.title=element_text(color="black",size=30),
                panel.grid.minor = element_line(colour = NA),
                legend.text=element_text(size=17),legend.key=element_rect(fill="white"),
                legend.title=element_text(size=18,face="bold"),
                axis.text.x=element_text(angle=60,size=26,vjust=0.5),
                panel.border = element_rect(colour = "black", fill=NA, size=3),
                legend.position = "none")

##### DADA2 Pipeline ##### 
# completed using RStudio AMI courtesy of Louis Aslett, thank you! #
# used a M4.2XL instance #

# courtesy of Benji Callahan - DADA2 Tutorial #
# For each sequencing run follow the pipeline below #

path<-"directory with fastq files"
fns <- list.files(path)
fns

### Filtering and Trimming ###
fastqs <- fns[grepl(".fastq$", fns)] # List names of all files ending with .fastq
fastqs <- sort(fastqs) # Sort ensures forward/reverse reads are in same order
fnFs <- fastqs[grepl("_R1", fastqs)] # Just the forward read files
fnRs <- fastqs[grepl("_R2", fastqs)] # Just the reverse read files
# Get sample names from the first part of the forward read filenames
sample.names <- sapply(strsplit(fnFs, "_"), `[`, 1)
# Fully specify the path for the fnFs and fnRs
fnFs <- file.path(path, fnFs)
fnRs <- file.path(path, fnRs)

# Make directory and filenames for the filtered fastqs
filt_path <- file.path(path, "filtered")
if(!file_test("-d", filt_path)) dir.create(filt_path)
filtFs <- file.path(filt_path, paste0(sample.names, "_F_filt.fastq.gz"))
filtRs <- file.path(filt_path, paste0(sample.names, "_R_filt.fastq.gz"))

# Filter Started 12:57 - 1:33 # filtering looks good
for(i in seq_along(fnFs)) {
  fastqPairedFilter(c(fnFs[i], fnRs[i]), c(filtFs[i], filtRs[i]),
                    truncLen=c(140,140), trimLeft=c(5,5),
                    maxN=0, maxEE=2, truncQ=2, 
                    compress=TRUE, verbose=TRUE)
}

# Dereplication #
derepFs <- derepFastq(filtFs, verbose=TRUE)
derepRs <- derepFastq(filtRs, verbose=TRUE)
# Name the derep-class objects by the sample names
names(derepFs) <- sample.names
names(derepRs) <- sample.names

set.seed(100)
errF <- learnErrors(filtFs, nread=2e6, multithread=TRUE)
errR <- learnErrors(filtRs, nread=2e6, multithread=TRUE)

dadaFs <- dada(derepFs, err=errF, multithread=TRUE)
saveRDS(dadaFs, "")
dadaRs <- dada(derepRs, err=errR, multithread=TRUE)
saveRDS(dadaFs, "")

# Merge #
mergers <- mergePairs(dadaFs, derepFs, dadaRs, derepRs, verbose=TRUE)
saveRDS(mergers, "")
seqtab <- makeSequenceTable(mergers)
saveRDS(seqtab, "")
dim(seqtab) 
table(nchar(colnames(seqtab)))

# Chimera removal #
seqtab.nochim <- removeBimeraDenovo(seqtab, verbose=TRUE) 
dim(seqtab.nochim) 
sum(seqtab.nochim)/sum(seqtab)
table(nchar(colnames(seqtab.nochim))) 
saveRDS(seqtab.nochim, "")

# Merge sequence tables from each run #
seqtab.total<-mergeSequenceTables(seqtab.nochim1,seqtab.nochim2)

# Assign taxonomy #
taxa<-assignTaxonomy(seqtab.total,"silva_nr_v128_train_set.fa.gz")
saveRDS(taxa,"")

# Build bacterial phylogeny #
seqs<-getSequences(seqtab.total)
seq.names<-colnames(seqtab.total)
write.fasta(as.list(seqs), names = seq.names, file.out="seqtab.total.fasta")

# import .fasta file from above into PASTA (https://github.com/smirarab/pasta) to align and build 
# bacterial phylogenetic tree


#### Import ####
seqtab.total<-readRDS("PNA_root_microbiome_seqtab.rds")
bac.tree<-read.tree(file= "PNA_16S_root_microbiome.tre")

samples.out<-rownames(seqtab.total)

meta.data<-read.csv(file="PNA_metadata.csv")
meta.data<-meta.data[,-c(1)]
rownames(meta.data) <- samples.out

taxa<-readRDS("PNA_root_microbiome_SILVA_taxa.rds")

ps <- phyloseq(otu_table(seqtab.total, taxa_are_rows=FALSE), 
               sample_data(meta.data), 
               tax_table(taxa),
               phy_tree(bac.tree))

colnames(tax_table(ps)) = c("Domain", "Phylum", "Class", "Order", "Family", "Genus")

# remove controls
ps0<-subset_samples(ps, community != "PAO" & community != "MOCK" & community != "Water" & community != "WATER")

# remove low coverage host plant species: 131, 139, 14, 146, 149, 154, 161, 164, 56, 79, 8, 93, 94, 99
table(meta.data[,2], exclude = NULL)

ps1<-subset_samples(ps0, species != "131" & species != "139" & 
                      species != "14" & species != "146" & species != "8" &
                      species != "93" & species != "94" & species != "149" &
                      species != "154" & species != "161" & species != "164" &
                      species != "56" & species != "79" & species != "99")

ps2 = subset_taxa(ps1, Domain == "Bacteria") # removes Archaea, Eukaryota or unknown
ps3 <- subset_taxa(ps2, !is.na(Phylum)) #removes unkown Phylum
bad.family<-c('Mitochondria')
ps4 = subset_taxa(ps3, !Family %in% bad.family) # remove mitochondira

#calculate # of usable reads after removing above but before removing chloroplast
sample_data(ps4)$Reads<-sample_sums(ps4)

bad.class<-c("Chloroplast")

ps5 = subset_taxa(ps4, !Class %in% bad.class) # remove chloroplast
ps5

#calculate # of usable reads after removing chloroplast
sample_data(ps5)$ReadsNC<-sample_sums(ps5)

# create data.frame which includes total reads before and after chloroplast removal
df1<-as(sample_data(ps5),'data.frame')

df1$ChlContam<-(df1$Reads-df1$ReadsNC)/df1$Reads # calculate proportion of sequenced reads belonging to Chloroplast Class
df.fin<-df1[df1$Reads>800,] # remove samples with < 800 reads
df.fin$logit.ChlContam<-car::logit(df.fin$ChlContam,adjust=0.00025) # perform logit transformation log(p/1-p)
df.fin$run<-as.factor(df.fin$run)
df.fin$Reads<-log(df.fin$Reads)

# create subsets of data #
endo.data<-df.fin[df.fin$community=="E",] # just endosphere samples
endo.data$tissue<-c(rep("root",268),rep("leaf",6),rep("root",34)) # add data column for tissue type
endo.data<-endo.data[endo.data$run != 5,] # remove samples from Run 5
rhizo.data<-df.fin[df.fin$community=="R",] # just rhizosphere samples
endo.data.Lund<-endo.data[endo.data$pna=="O",] # just samples amplified with the original clamps
# non-aster hosts and original clamps
endo.data.Lund.nonaster<-endo.data.Lund[endo.data.Lund$species != "22" & endo.data.Lund$species != "143" &
                                     endo.data.Lund$species != "40" & endo.data.Lund$species != "ST" &
                                     endo.data.Lund$species != "15" & endo.data.Lund$species != "142" & endo.data.Lund$species != "RX",]
hist(endo.data$ChlContam)
hist(endo.data$logit.ChlContam)

#### Contamination analysis ####
# Does contamination vary across plant species with original clamps? #
# all host species, original clamps #
m1<-lmer(logit.ChlContam~Reads+(1|species),data=endo.data.Lund)
car::Anova(m1,type="III",test.statistic="F",contrasts=list(topic=contr.sum, sys=contr.sum))
rand(m1)
plot(m1)
qqnorm(resid(m1))

# Does contamination vary across Asteraceae with original and modified clamps? #
# subset to just aster species amplified with original and modified clamps #
endo.data.aster<-endo.data[endo.data$species == "22" | endo.data$species == "143" | endo.data$species == "142" |
                             endo.data$species == "40" | endo.data$species == "ST" |
                             endo.data$species == "15",]
endo.data.aster<-endo.data.aster[endo.data.aster$tissue == "root",]
endo.data.aster<-droplevels(endo.data.aster)

m1<-lmer(logit.ChlContam~pna+Reads+(1|species)+
           (1|pna:species),data=endo.data.aster,REML=T)
car::Anova(m1,type="III",test.statistic="F",contrasts=list(topic=contr.sum, sys=contr.sum))
rand(m1)
plot(m1)
qqnorm(resid(m1))

# subset to non-aster species tested with original and modified clamps #
endo.data.nonaster<-endo.data[endo.data$species == "33" | endo.data$species == "106" |
                             endo.data$species == "71",]
endo.data.nonaster<-endo.data.nonaster[endo.data.nonaster$tissue == "root",]
endo.data.nonaster<-droplevels(endo.data.nonaster)

m1<-lmer(logit.ChlContam~pna+Reads+(1|species)+
           (1|pna:species),data=endo.data.nonaster,REML=T)
car::Anova(m1,type="III",test.statistic="F",contrasts=list(topic=contr.sum, sys=contr.sum))
rand(m1)
plot(m1)
qqnorm(resid(m1))

# Figures #
# mean contamination across species with original clamps
endo.oclamp<-endo.data[endo.data$pna=="O" & endo.data$tissue == "root",] 
mean.chlcont.o<-aggregate(endo.oclamp$ChlContam ~ endo.oclamp$species + endo.oclamp$tissue, data=endo.oclamp,mean)
rownames(mean.chlcont.o)<-mean.chlcont.o$`endo.oclamp$species`
mean(mean.chlcont.o$`endo.oclamp$ChlContam`)

# mean contamination across Aster species #
endo.oclamp.aster<-endo.data.aster[endo.data.aster$pna=="O" & endo.data.aster$tissue == "root",] 
mean.chlcont.o.aster<-aggregate(endo.oclamp.aster$ChlContam ~ endo.oclamp.aster$species + endo.oclamp.aster$tissue, data=endo.oclamp.aster,mean)
rownames(mean.chlcont.o.aster)<-mean.chlcont.o.aster$`endo.oclamp$species`
mean(mean.chlcont.o.aster$`endo.oclamp.aster$ChlContam`)

# mean contamination across non-Aster species #
endo.oclamp.nonaster<-endo.data.Lund.nonaster[endo.data.Lund.nonaster$pna=="O" & endo.data.Lund.nonaster$tissue == "root",] 
mean.chlcont.o.nonaster<-aggregate(endo.oclamp.nonaster$ChlContam ~ endo.oclamp.nonaster$species + endo.oclamp.nonaster$tissue, data=endo.oclamp.nonaster,mean)
rownames(mean.chlcont.o.nonaster)<-mean.chlcont.o.nonaster$`mean.chlcont.o.nonaster$species`
mean(mean.chlcont.o.nonaster$`endo.oclamp.nonaster$ChlContam`)


# mean contamination across species with modified clamps
endo.mclamp<-endo.data[endo.data$pna=="M" & endo.data$tissue == "root",] 
mean.chlcont.m<-aggregate(endo.mclamp$ChlContam ~ endo.mclamp$species + endo.mclamp$tissue, data=endo.mclamp,mean)
rownames(mean.chlcont.m)<-mean.chlcont.m$`endo.mclamp$species`

aster<-c("142","143","15","ST","22","40")
aster.con<-mean.chlcont.o[c("142","143","15","ST","22","40"),3]
naster.con<-mean.chlcont.o[!rownames(mean.chlcont.o) %in% aster,3]
wilcox.test(aster.con,naster.con,alternative="greater")

# Rhizosphere #
# mean contamination across species with original clamps
rhizo.oclamp<-rhizo.data[rhizo.data$pna=="O",] 
mean.chlcont.o.rhizo<-aggregate(rhizo.oclamp$ChlContam ~ rhizo.oclamp$species, data=rhizo.oclamp,mean)
rownames(mean.chlcont.o.rhizo)<-mean.chlcont.o.rhizo$`rhizo.oclamp$species`

# plant phylogeny #
tree<-read.nexus("PNA_host_plant.tre")
tree$tip.label
plot.phylo(tree)
tree<-drop.tip(tree, c("Equisetum"))

## endosphere contamination across phylogeny ##
mean.chlcont.o<-mean.chlcont.o[c("144","105","106","66","30","20","112","72","71",
                                 "162","95","92","54","RX","100","101","134","87","33",
                                 "137","45","108","109","17","22","142","143","40",
                                 "ST","15","113","7"),]

# just chl #
chl.contamint.df<-mean.chlcont.o[,c(1,3)]
chl.contamint.df$bacteria<-1-chl.contamint.df[,2]
colnames(chl.contamint.df)<-c("species","chl","bac")
chl.cont.melt <- melt(chl.contamint.df, id.vars = "species")
chl.cont.melt$species<-factor(chl.cont.melt$species,
                              levels = c("144","105","106","66","30","20","112","72","71",
                                         "162","95","92","54","RX","100","101","134","87","33",
                                         "137","45","108","109","17","22","142","143","40",
                                         "ST","15","113","7"))
group.colors <- c("chl" = "#4daf4a", "bac"="black") 

pdf(file="",
    width=8,height=11,bg = "transparent")
ggplot(chl.cont.melt, aes(x= species, y= value, fill = variable)) + 
  geom_bar(stat = "identity") + theme.gg + coord_flip() +
  scale_fill_manual(values=group.colors)
dev.off()

## modified contamination rates ##
# just chl #
mod.contamint.df<-mean.chlcont.m[,c(1,3)]
mod.contamint.df$bacteria<-1-mod.contamint.df[,2]
colnames(mod.contamint.df)<-c("species","chl","bac")
mod.cont.melt <- melt(mod.contamint.df, id.vars = "species")
mod.cont.melt$species<-factor(mod.cont.melt$species,
                              levels = c("106","143","15","22","33","40","71",
                                         "ST"))

pdf(file="",
    width=8,height=11,bg = "transparent")
ggplot(mod.cont.melt, aes(x= species, y= value, fill = variable)) + 
  geom_bar(stat = "identity") + theme.gg + coord_flip() +
  scale_fill_manual(values=group.colors)
dev.off()

## plot of avg contamination in aster and non-aster with original and mod clamps ##
m.o.na<-mean(mean.chlcont.o.nonaster$`endo.oclamp.nonaster$ChlContam`) # 0.1174779
s.o.na<-st.err(mean.chlcont.o.nonaster$`endo.oclamp.nonaster$ChlContam`) # 0.02309291

m.o.a<-mean(mean.chlcont.o.aster$`endo.oclamp.aster$ChlContam`) # 0.6469879
s.o.a<-st.err(mean.chlcont.o.aster$`endo.oclamp.aster$ChlContam`) # 0.1623023

m.m.na<-mean(mean.chlcont.m[c(1,6,8),3]) # 0.6942925
s.m.na<-st.err(mean.chlcont.m[c(1,6,8),3]) # 0.1296703

m.m.a<-mean(mean.chlcont.m[c(2:5,7,9),3]) # 0.2330572
s.m.a<-st.err(mean.chlcont.m[c(2:5,7,9),3]) # 0.06992042

pd<-c("NA","NA","A","A")
cd<-c("O","M","O","M")
md<-c(m.o.na,m.o.a,m.m.na,m.m.a)
sed<-c(s.o.na,s.o.a,s.m.na,s.m.a)
agg.dat<-data.frame(pd,cd,md,sed)
agg.dat$f1f2<-interaction(agg.dat$pd,agg.dat$cd)
agg.dat$f1f2<-factor(agg.dat$f1f2,
                     levels=c("A.O","NA.O","A.M","NA.M"),
                     ordered=T)

pdf(file="",
    width=4,height=5,bg = "transparent")
ggplot(data=agg.dat, aes(x=f1f2, y=md)) +
  geom_errorbar(aes(ymin=md-sed, ymax=md+sed), width=.2) +
  geom_point(aes(colour=cd,shape=pd),size=8) +
  scale_color_manual(values=c("#0f510b","#4daf4a")) +
  scale_y_continuous(breaks=seq(0,1,0.1)) + coord_cartesian(ylim=c(0,1)) +
  theme.gg
dev.off()

#### Alpha diversity ####
# keep only species sequenced with both PNA types # 
psD<-subset_samples(ps5, species == "15" | species == "22" | species == "142" |
                      species == "40" | species == "143" | species == "ST" | 
                      species == "33" | species == "71" | species == "106")
psD1<-subset_samples(psD,Reads>=800) # removes 7 samples
psD2<-subset_samples(psD1,run < 5 | run > 5) # remove samples from Run 5

alpha.1<-as.data.frame(estimate_richness(psD2,measures=c("Observed","InvSimpson")))
alpha.1.sd<-as(sample_data(psD2),'data.frame')
alpha.2<-cbind(alpha.1.sd,alpha.1)
alpha.2$E2<-alpha.2$InvSimpson/alpha.2$Observed

alpha.endo<-alpha.2[alpha.2$community=="E",] # only endosphere samples

plot(log(Observed)~log(ReadsNC),data=alpha.endo)
plot(log(InvSimpson)~log(ReadsNC),data=alpha.endo)
plot(E2~log(ReadsNC),data=alpha.endo)

# remove C. solstitialis leaves from these analyses #
alpha.endo<-alpha.endo[-c(65:70),]
alpha.endo$logReads<-log(alpha.endo$ReadsNC)

### log(Observed) ###
m1<-lmer(log(Observed)~pna+logReads+(1|species)+(1|species:pna),data=alpha.endo,REML=T)
car::Anova(m1,type="III",test.statistic="F",contrasts=list(topic=contr.sum, sys=contr.sum))
rand(m1)
plot(m1)
qqnorm(resid(m1))

### log(InvSimpson) ###
m1<-lmer(log(InvSimpson)~pna+logReads+(1|species)+(1|species:pna),data=alpha.endo)
car::Anova(m1,type="III",test.statistic="F",contrasts=list(topic=contr.sum, sys=contr.sum))
rand(m1)
plot(m1)
qqnorm(resid(m1))

### E2 ###
m1<-lmer(log(E2)~pna+logReads+(1|species)+(1|species:pna),data=alpha.endo,REML=T)
car::Anova(m1,type="III",test.statistic="F",contrasts=list(topic=contr.sum, sys=contr.sum))
rand(m1)
plot(m1)
qqnorm(resid(m1))

# Figures #
# plot showing diversity in aster and non-aster with original and mod PNA #
alpha.endo$log.IS<-log(alpha.endo$InvSimpson)
alpha.endo$pna<-factor(alpha.endo$pna,
                       levels=c("O","M"),
                       ordered=T)

pdf(file="",
    width=4,height=5,bg = "transparent")
ggplot(data=alpha.endo, aes(x=pna, y=log.IS, fill = pna)) +
  geom_jitter(alpha=.5,width=.3) +
  geom_boxplot()+ 
  scale_fill_manual(values=c("#4daf4a", "#0f510b")) +
  theme.gg
dev.off()

#### Beta diversity ####
# remove rhizosphere samples #
psB<-subset_samples(psD2,community=="E")
psB1<-subset_samples(psB,ReadsNC>=800)
# remove C. solstitalis leave samples
leaves<-c("ST-HU01-8-L-M","ST-HU01-8-L-O")
psB2<-subset_samples(psB1,!sample_names(psB1) %in% leaves)
psB2<-prune_taxa(taxa_sums(psB2)>0,psB2)

threshold<-kOverA(2,A=25) # set threshold values (require k samples with A reads)
psB3<-filter_taxa(psB2,threshold,TRUE) #1424 taxa / 6695
sum(taxa_sums(psB3))/sum(taxa_sums(psB2)) # 96%

# perform relative abundance transformation #
psB1.ra = transform_sample_counts(psB3, function(x){x / sum(x)})

out.wunifrac.psB1 <- ordinate(psB1.ra, method = "MDS", distance = "wunifrac")
out.uunifrac.psB1 <- ordinate(psB1.ra, method = "MDS", distance = "unifrac")
out.bray.psB1 <- ordinate(psB1.ra, method = "MDS", distance = "bray")

## axis scores for each distance metric ##
## wunifrac ##
sum(out.wunifrac.psB1$values$Eigenvalues[1:3])/sum(out.wunifrac.psB1$values$Eigenvalues) # Variance explained by first 3 axes 0.63
a1.w<-as.data.frame(out.wunifrac.psB1$vectors[,1])
a2.w<-as.data.frame(out.wunifrac.psB1$vectors[,2])
a3.w<-as.data.frame(out.wunifrac.psB1$vectors[,3])
pcoa.axes.wunifrac.psB1<-cbind(a1.w,a2.w,a3.w)
colnames(pcoa.axes.wunifrac.psB1)<-c("a1.w","a2.w","a3.w")

## uunifrac ##
sum(out.uunifrac.psB1$values$Eigenvalues[1:3])/sum(out.uunifrac.psB1$values$Eigenvalues) # 0.36
a1.u<-as.data.frame(out.uunifrac.psB1$vectors[,1])
a2.u<-as.data.frame(out.uunifrac.psB1$vectors[,2])
a3.u<-as.data.frame(out.uunifrac.psB1$vectors[,3])
pcoa.axes.uunifrac.psB1<-cbind(a1.u,a2.u,a3.u)
colnames(pcoa.axes.uunifrac.psB1)<-c("a1.u","a2.u","a3.u")

## Bray-Curtis ##
sum(out.bray.psB1$values$Eigenvalues[1:3])/sum(out.bray.psB1$values$Eigenvalues) # 0.32
a1.b<-as.data.frame(out.bray.psB1$vectors[,1])
a2.b<-as.data.frame(out.bray.psB1$vectors[,2])
a3.b<-as.data.frame(out.bray.psB1$vectors[,3])
pcoa.axes.bray.psB1<-cbind(a1.b,a2.b,a3.b)
colnames(pcoa.axes.bray.psB1)<-c("a1.b","a2.b","a3.b")

## Combining all measures ## Dataframe of PCoA scores together ##
meta.data.psB1<-as(sample_data(psB1.ra),"data.frame")
ps.psB1.pcoa<-cbind(meta.data.psB1,pcoa.axes.bray.psB1,pcoa.axes.uunifrac.psB1,pcoa.axes.wunifrac.psB1)
ps.psB1.pcoa$UsableReads<-log(ps.psB1.pcoa$ReadsNC)

with(ps.psB1.pcoa,table(pna,species))

m1<-lmer(a1.w~UsableReads+pna+(1|species:pna)+(1|species),
         data=ps.psB1.pcoa, REML=T)
car::Anova(m1,type="III",test.statistic="F",contrasts=list(topic=contr.sum, sys=contr.sum))
rand(m1)
plot(m1)
qqnorm(resid(m1))

m1<-lmer(a2.w~UsableReads+pna+(1|species:pna)+(1|species),
         data=ps.psB1.pcoa)
car::Anova(m1,type="III",test.statistic="F",contrasts=list(topic=contr.sum, sys=contr.sum))
rand(m1)
plot(m1)
qqnorm(resid(m1))

m1<-lmer(a3.w~UsableReads+pna+(1|species:pna)+(1|species),
         data=ps.psB1.pcoa)
car::Anova(m1,type="III",test.statistic="F",contrasts=list(topic=contr.sum, sys=contr.sum))
rand(m1)
plot(m1)
qqnorm(resid(m1))

## Permanova ##
dist.wu <- phyloseq::distance(psB1.ra, method="wunifrac")
md.psB1<-data.frame(sample_data(psB1.ra))
md.psB1$UsableReads<-log(md.psB1$Reads)
adonis(dist.wu ~ pna*species+UsableReads, data = md.psB1)

# PCoA figure #
group.colors <- c("106"="#2E8B57","142"="#FF4040","143"="#2F4F4F",
                  "15"="#984ea3","22"="#ff7f00","33"="#3A5FCD",
                  "40"="#a65628","71"="#EEDC82","ST"="#8B3A3A")

pdf(file="",
    width=8,height=6,bg = "transparent")
plot_ordination(psB1.ra, out.wunifrac.psB1, type="samples") +
  geom_point(aes(shape=pna,fill=species),color="black",size=8) + theme.gg + 
  scale_fill_manual(values=group.colors)+
  scale_shape_manual(values=c(21,24))
dev.off()

#### Differential abundance testing ####
# Bin reads to taxonomic ranks and test if taxa are differentially abundant across PNA type
# using DESeq2 and ALDEx2 #

ps.DA<-subset_samples(psB3,run < 5 | run > 5)
gm_mean = function(x, na.rm=TRUE){
  exp(sum(log(x[x > 0]), na.rm=na.rm) / length(x))
}
ps.DA<-prune_taxa(taxa_sums(ps.DA)>0,ps.DA); ntaxa(ps.DA)

ps.DA.phy<-tax_glom(ps.DA,taxrank="Phylum")
taxa_names(ps.DA.phy)<-as.data.frame(tax_table(ps.DA.phy)[,2])$Phylum  # update taxa names

# tax.glom by Class #
ps.DA.cla<-tax_glom(ps.DA,taxrank="Class")
taxa_names(ps.DA.cla)<-as.data.frame(tax_table(ps.DA.cla)[,3])$Class  # update taxa names

# tax.glom by Order #
ps.DA.ord<-tax_glom(ps.DA,taxrank="Order")
taxa_names(ps.DA.ord)<-make.names(as.data.frame(tax_table(ps.DA.ord)[,4])$Order,unique = T)  # update taxa names

# tax.glom by Family #
ps.DA.fam<-tax_glom(ps.DA,taxrank="Family")
taxa_names(ps.DA.fam)<-make.names(as.data.frame(tax_table(ps.DA.fam)[,5])$Family,unique=T)  # update taxa names

# tax.glom by Genus #
ps.DA.gen<-tax_glom(ps.DA,taxrank="Genus")
taxa_names(ps.DA.gen)<-as.data.frame(tax_table(ps.DA.gen)[,6])$Genus  # update taxa names

## Phylum ##
# DESeq2 #
# obtain P value for species X PNA
dds.phy<-phyloseq_to_deseq2(ps.DA.phy,~ pna+species+pna:species) # create full model without interactions
dds.phy = estimateSizeFactors(dds.phy, geoMeans = apply(counts(dds.phy), 1, gm_mean))
dds.phy.pval<-DESeq(dds.phy,test="LRT",reduced=~pna+species) # perform LRT to obtain p value #
res.dds.phy.pval.speXpna = cbind(as(results(dds.phy.pval), "data.frame"), as(tax_table(ps.DA.phy)[rownames(dds.phy.pval), ], "matrix"))

# obtain P value for Species and PNA
dds.phy<-phyloseq_to_deseq2(ps.DA.phy,~ pna+species) # create full model without interactions
dds.phy = estimateSizeFactors(dds.phy, geoMeans = apply(counts(dds.phy), 1, gm_mean))
dds.phy.pval<-DESeq(dds.phy,test="LRT",reduced=~pna) # perform LRT to obtain p value #
res.dds.phy.pval.spe = cbind(as(results(dds.phy.pval), "data.frame"), as(tax_table(ps.DA.phy)[rownames(dds.phy.pval), ], "matrix"))
dds.phy.pval<-DESeq(dds.phy,test="LRT",reduced=~species) # perform LRT to obtain p value #
res.dds.phy.pval.pna = cbind(as(results(dds.phy.pval), "data.frame"), as(tax_table(ps.DA.phy)[rownames(dds.phy.pval), ], "matrix"))

# Phylum Level P Values #
res.phy<-cbind(res.dds.phy.pval.speXpna[,c(8:12,6)],res.dds.phy.pval.spe[,6],res.dds.phy.pval.pna[,6])
colnames(res.phy)[6:8]<-c("padj.speXPNA","padj.spe","padj.pna")

# ALDEx2 #
conds<-as.data.frame(sample_data(ps.DA.phy))
conds.pna<-as.character(conds$pna)
conds.spe<-as.character(conds$spe)
aldex2.phy<-as.data.frame(t(otu_table(ps.DA.phy)))
aldex2.phy.pna <- aldex(aldex2.phy, conds.pna, mc.samples=128, test="t", effect=TRUE,
               include.sample.summary=FALSE, denom="all", verbose=FALSE)
aldex2.phy.spe <- aldex(aldex2.phy, conds.spe, mc.samples=128, test="glm", effect=TRUE,
                        include.sample.summary=FALSE, denom="all", verbose=FALSE)
aldex.plot(aldex2.phy.pna, type="MW", test="welch")

## Class ##
# DESeq2 #
# obtain P value for species X PNA
dds.cla<-phyloseq_to_deseq2(ps.DA.cla,~ pna+species+pna:species) # create full model without interactions
dds.cla = estimateSizeFactors(dds.cla, geoMeans = apply(counts(dds.cla), 1, gm_mean))
dds.cla.pval<-DESeq(dds.cla,test="LRT",reduced=~pna+species) # perform LRT to obtain p value #
res.dds.cla.pval.speXpna = cbind(as(results(dds.cla.pval), "data.frame"), as(tax_table(ps.DA.cla)[rownames(dds.cla.pval), ], "matrix"))

# obtain P value for Species and PNA
dds.cla<-phyloseq_to_deseq2(ps.DA.cla,~ pna+species) # create full model without interactions
dds.cla = estimateSizeFactors(dds.cla, geoMeans = apply(counts(dds.cla), 1, gm_mean))
dds.cla.pval<-DESeq(dds.cla,test="LRT",reduced=~pna) # perform LRT to obtain p value #
res.dds.cla.pval.spe = cbind(as(results(dds.cla.pval), "data.frame"), as(tax_table(ps.DA.cla)[rownames(dds.cla.pval), ], "matrix"))
dds.cla.pval<-DESeq(dds.cla,test="LRT",reduced=~species) # perform LRT to obtain p value #
res.dds.cla.pval.pna = cbind(as(results(dds.cla.pval), "data.frame"), as(tax_table(ps.DA.cla)[rownames(dds.cla.pval), ], "matrix"))

# Class Level P Values #
res.cla<-cbind(res.dds.cla.pval.speXpna[,c(8:12,6)],res.dds.cla.pval.spe[,6],res.dds.cla.pval.pna[,6])
colnames(res.cla)[6:8]<-c("padj.speXPNA","padj.spe","padj.pna")

# ALDEx2 #
aldex2.cla<-as.data.frame(t(otu_table(ps.DA.cla)))
aldex2.cla.pna <- aldex(aldex2.cla, conds.pna, mc.samples=128, test="t", effect=TRUE,
                        include.sample.summary=FALSE, denom="all", verbose=FALSE)
aldex2.cla.spe <- aldex(aldex2.cla, conds.spe, mc.samples=128, test="glm", effect=TRUE,
                        include.sample.summary=FALSE, denom="all", verbose=FALSE)

# DESeq2 #
## Order ##
# obtain P value for species X PNA
dds.ord<-phyloseq_to_deseq2(ps.DA.ord,~ pna+species+pna:species) # create full model without interactions
dds.ord = estimateSizeFactors(dds.ord, geoMeans = apply(counts(dds.ord), 1, gm_mean))
dds.ord.pval<-DESeq(dds.ord,test="LRT",reduced=~pna+species) # perform LRT to obtain p value #
res.dds.ord.pval.speXpna = cbind(as(results(dds.ord.pval), "data.frame"), as(tax_table(ps.DA.ord)[rownames(dds.ord.pval), ], "matrix"))

# obtain P value for Species and PNA
dds.ord<-phyloseq_to_deseq2(ps.DA.ord,~ pna+species) # create full model without interactions
dds.ord = estimateSizeFactors(dds.ord, geoMeans = apply(counts(dds.ord), 1, gm_mean))
dds.ord.pval<-DESeq(dds.ord,test="LRT",reduced=~pna) # perform LRT to obtain p value #
res.dds.ord.pval.spe = cbind(as(results(dds.ord.pval), "data.frame"), as(tax_table(ps.DA.ord)[rownames(dds.ord.pval), ], "matrix"))
dds.ord.pval<-DESeq(dds.ord,test="LRT",reduced=~species) # perform LRT to obtain p value #
res.dds.ord.pval.pna = cbind(as(results(dds.ord.pval), "data.frame"), as(tax_table(ps.DA.ord)[rownames(dds.ord.pval), ], "matrix"))

# Order Level P Values #
res.ord<-cbind(res.dds.ord.pval.speXpna[,c(8:12,6)],res.dds.ord.pval.spe[,6],res.dds.ord.pval.pna[,6])
colnames(res.ord)[6:8]<-c("padj.speXPNA","padj.spe","padj.pna")

# ALDEx2 #
aldex2.ord<-as.data.frame(t(otu_table(ps.DA.ord)))
aldex2.ord.pna <- aldex(aldex2.ord, conds.pna, mc.samples=128, test="t", effect=TRUE,
                        include.sample.summary=FALSE, denom="all", verbose=FALSE)
aldex2.ord.spe <- aldex(aldex2.ord, conds.spe, mc.samples=128, test="glm", effect=TRUE,
                        include.sample.summary=FALSE, denom="all", verbose=FALSE)

# DESeq2 #
## Family ##
# obtain P value for species X PNA
dds.fam<-phyloseq_to_deseq2(ps.DA.fam,~ pna+species+pna:species) # create full model without interactions
dds.fam = estimateSizeFactors(dds.fam, geoMeans = apply(counts(dds.fam), 1, gm_mean))
dds.fam.pval<-DESeq(dds.fam,test="LRT",reduced=~pna+species) # perform LRT to obtain p value #
res.dds.fam.pval.speXpna = cbind(as(results(dds.fam.pval), "data.frame"), as(tax_table(ps.DA.fam)[rownames(dds.fam.pval), ], "matrix"))

# obtain P value for Species and PNA
dds.fam<-phyloseq_to_deseq2(ps.DA.fam,~ pna+species) # create full model without interactions
dds.fam = estimateSizeFactors(dds.fam, geoMeans = apply(counts(dds.fam), 1, gm_mean))
dds.fam.pval<-DESeq(dds.fam,test="LRT",reduced=~pna) # perform LRT to obtain p value #
res.dds.fam.pval.spe = cbind(as(results(dds.fam.pval), "data.frame"), as(tax_table(ps.DA.fam)[rownames(dds.fam.pval), ], "matrix"))
dds.fam.pval<-DESeq(dds.fam,test="LRT",reduced=~species) # perform LRT to obtain p value #
res.dds.fam.pval.pna = cbind(as(results(dds.fam.pval), "data.frame"), as(tax_table(ps.DA.fam)[rownames(dds.fam.pval), ], "matrix"))

# Family Level P Values #
res.fam<-cbind(res.dds.fam.pval.speXpna[,c(8:12,6)],res.dds.fam.pval.spe[,6],res.dds.fam.pval.pna[,6])
colnames(res.fam)[6:8]<-c("padj.speXPNA","padj.spe","padj.pna")

# ALDEx2 #
aldex2.fam<-as.data.frame(t(otu_table(ps.DA.fam)))
aldex2.fam.pna <- aldex(aldex2.fam, conds.pna, mc.samples=128, test="t", effect=TRUE,
                        include.sample.summary=FALSE, denom="all", verbose=FALSE)
aldex2.fam.spe <- aldex(aldex2.fam, conds.spe, mc.samples=128, test="glm", effect=TRUE,
                        include.sample.summary=FALSE, denom="all", verbose=FALSE)
aldex.plot(aldex2.fam.pna, type="MW", test="welch")

# DESeq2 #
## Genus ##
# obtain P value for species X PNA
dds.gen<-phyloseq_to_deseq2(ps.DA.gen,~ pna+species+pna:species) # create full model without interactions
dds.gen = estimateSizeFactors(dds.gen, geoMeans = apply(counts(dds.gen), 1, gm_mean))
dds.gen.pval<-DESeq(dds.gen,test="LRT",reduced=~pna+species) # perform LRT to obtain p value #
res.dds.gen.pval.speXpna = cbind(as(results(dds.gen.pval), "data.frame"), as(tax_table(ps.DA.gen)[rownames(dds.gen.pval), ], "matrix"))

# obtain P value for Species and PNA
dds.gen<-phyloseq_to_deseq2(ps.DA.gen,~ pna+species) # create full model without interactions
dds.gen = estimateSizeFactors(dds.gen, geoMeans = apply(counts(dds.gen), 1, gm_mean))
dds.gen.pval<-DESeq(dds.gen,test="LRT",reduced=~pna) # perform LRT to obtain p value #
res.dds.gen.pval.spe = cbind(as(results(dds.gen.pval), "data.frame"), as(tax_table(ps.DA.gen)[rownames(dds.gen.pval), ], "matrix"))
dds.gen.pval<-DESeq(dds.gen,test="LRT",reduced=~species) # perform LRT to obtain p value #
res.dds.gen.pval.pna = cbind(as(results(dds.gen.pval), "data.frame"), as(tax_table(ps.DA.gen)[rownames(dds.gen.pval), ], "matrix"))

# ALDEx2 #
aldex2.gen<-as.data.frame(t(otu_table(ps.DA.gen)))
aldex2.gen.pna <- aldex(aldex2.gen, conds.pna, mc.samples=128, test="t", effect=TRUE,
                        include.sample.summary=FALSE, denom="all", verbose=FALSE)
aldex2.gen.spe <- aldex(aldex2.gen, conds.spe, mc.samples=128, test="glm", effect=TRUE,
                        include.sample.summary=FALSE, denom="all", verbose=FALSE)

# DESeq2 #
# ASV Level P Values #
res.gen<-cbind(res.dds.gen.pval.speXpna[,c(8:12,6)],res.dds.gen.pval.spe[,6],res.dds.gen.pval.pna[,6])
colnames(res.gen)[6:8]<-c("padj.speXPNA","padj.spe","padj.pna")

dds.asv<-phyloseq_to_deseq2(ps.DA,~ pna+species+pna:species) # create full model without interactions
dds.asv = estimateSizeFactors(dds.asv, geoMeans = apply(counts(dds.asv), 1, gm_mean))
dds.asv.pval<-DESeq(dds.asv,test="LRT",reduced=~pna+species) # perform LRT to obtain p value #
res.dds.asv.pval.speXpna = cbind(as(results(dds.asv.pval), "data.frame"), as(tax_table(ps.DA)[rownames(dds.asv.pval), ], "matrix"))

# obtain P value for Species and PNA
dds.asv<-phyloseq_to_deseq2(ps.DA,~ pna+species) # create full model without interactions
dds.asv = estimateSizeFactors(dds.asv, geoMeans = apply(counts(dds.asv), 1, gm_mean))
dds.asv.pval<-DESeq(dds.asv,test="LRT",reduced=~pna) # perform LRT to obtain p value #
res.dds.asv.pval.spe = cbind(as(results(dds.asv.pval), "data.frame"), as(tax_table(ps.DA)[rownames(dds.asv.pval), ], "matrix"))
dds.asv.pval<-DESeq(dds.asv,test="LRT",reduced=~species) # perform LRT to obtain p value #
res.dds.asv.pval.pna = cbind(as(results(dds.asv.pval), "data.frame"), as(tax_table(ps.DA)[rownames(dds.asv.pval), ], "matrix"))

# ASV Level P Values #
res.asv<-cbind(res.dds.asv.pval.speXpna[,c(8:12,6)],res.dds.asv.pval.spe[,6],res.dds.asv.pval.pna[,6])
colnames(res.asv)[6:8]<-c("padj.speXPNA","padj.spe","padj.pna")

# ALDEx2 #
aldex2.asv<-as.data.frame(t(otu_table(ps.DA)))
aldex2.asv.pna <- aldex(aldex2.asv, conds.pna, mc.samples=128, test="t", effect=TRUE,
                        include.sample.summary=FALSE, denom="all", verbose=FALSE)
aldex2.asv.spe <- aldex(aldex2.asv, conds.spe, mc.samples=128, test="glm", effect=TRUE,
                        include.sample.summary=FALSE, denom="all", verbose=FALSE)

#### Rarefaction ####
set.seed(10021987)
psrare = rarefy_even_depth(ps5, sample.size = 800)
sum(taxa_sums(psrare))/sum(taxa_sums(ps5)) # 0.02%
psrare1<-subset_samples(psrare, species == "15" | species == "22" | species == "142" |
                      species == "40" | species == "143" | species == "ST" | 
                      species == "33" | species == "71" | species == "106")
psrare2<-subset_samples(psrare1,run < 5 | run > 5) # remove samples from Run 5
psrare3<-subset_samples(psrare2,community =="E")

alpha.1.rare<-as.data.frame(estimate_richness(psrare3,measures=c("Observed","InvSimpson")))
alpha.1.sd<-as(sample_data(psrare3),'data.frame')
alpha.2.rare<-cbind(alpha.1.sd,alpha.1.rare)
alpha.2.rare$E2<-alpha.2.rare$InvSimpson/alpha.2.rare$Observed

# remove ST leaves from these analyses #
alpha.endo<-alpha.2.rare[-c(65:66),]

### Observed ###
m1<-lmer(log(Observed)~pna+(1|species)+(1|species:pna),data=alpha.endo,REML=T)
car::Anova(m1,type="III",test.statistic="F",contrasts=list(topic=contr.sum, sys=contr.sum))
rand(m1)

### log(InvSimpson) ###
m1<-lmer(log(InvSimpson)~pna+(1|species)+(1|species:pna),data=alpha.endo,REML=T)
car::Anova(m1,type="III",test.statistic="F",contrasts=list(topic=contr.sum, sys=contr.sum))
rand(m1)

### E2 ###
m1<-lmer(log(E2)~pna+(1|species)+(1|species:pna),data=alpha.endo,REML=T)
car::Anova(m1,type="III",test.statistic="F",contrasts=list(topic=contr.sum, sys=contr.sum))
rand(m1)


leaves<-c("ST-HU01-8-L-M","ST-HU01-8-L-O")
psrare4<-subset_samples(psrare3,!sample_names(psrare3) %in% leaves)
psrare4<-prune_taxa(taxa_sums(psrare4)>0,psrare4)

out.wunifrac.psrare <- ordinate(psrare4, method = "MDS", distance = "wunifrac")
out.uunifrac.psrare <- ordinate(psrare4, method = "MDS", distance = "unifrac")
out.bray.psrare <- ordinate(psrare4, method = "MDS", distance = "bray")

## axis scores for each distance metric ##
## wunifrac ##
sum(out.wunifrac.psrare$values$Eigenvalues[1:3])/sum(out.wunifrac.psrare$values$Eigenvalues) # 0.59
a1.w<-as.data.frame(out.wunifrac.psrare$vectors[,1])
a2.w<-as.data.frame(out.wunifrac.psrare$vectors[,2])
a3.w<-as.data.frame(out.wunifrac.psrare$vectors[,3])
pcoa.axes.wunifrac.psrare<-cbind(a1.w,a2.w,a3.w)
colnames(pcoa.axes.wunifrac.psrare)<-c("a1.w","a2.w","a3.w")

## uunifrac ##
sum(out.uunifrac.psrare$values$Eigenvalues[1:3])/sum(out.uunifrac.psrare$values$Eigenvalues) # 0.24
a1.u<-as.data.frame(out.uunifrac.psrare$vectors[,1])
a2.u<-as.data.frame(out.uunifrac.psrare$vectors[,2])
a3.u<-as.data.frame(out.uunifrac.psrare$vectors[,3])
pcoa.axes.uunifrac.psrare<-cbind(a1.u,a2.u,a3.u)
colnames(pcoa.axes.uunifrac.psrare)<-c("a1.u","a2.u","a3.u")

## Bray-Curtis ##
sum(out.bray.psrare$values$Eigenvalues[1:3])/sum(out.bray.psrare$values$Eigenvalues) # 0.28
a1.b<-as.data.frame(out.bray.psrare$vectors[,1])
a2.b<-as.data.frame(out.bray.psrare$vectors[,2])
a3.b<-as.data.frame(out.bray.psrare$vectors[,3])
pcoa.axes.bray.psrare<-cbind(a1.b,a2.b,a3.b)
colnames(pcoa.axes.bray.psrare)<-c("a1.b","a2.b","a3.b")

## Combining all measures ## Dataframe of PCoA scores of endo and rhizo together ##
meta.data.psrare<-as(sample_data(psrare4),"data.frame")
ps.psrare.pcoa<-cbind(meta.data.psrare,pcoa.axes.bray.psrare,pcoa.axes.uunifrac.psrare,pcoa.axes.wunifrac.psrare)

with(ps.psrare.pcoa,table(pna,species))

m1<-lmer(a1.w~pna+(1|species:pna)+(1|species),
         data=ps.psrare.pcoa, REML=T)
car::Anova(m1,type="III",test.statistic="F",contrasts=list(topic=contr.sum, sys=contr.sum))
rand(m1)

m1<-lmer(a2.w~pna+(1|species:pna)+(1|species),
         data=ps.psrare.pcoa,REML=T)
car::Anova(m1,type="III",test.statistic="F",contrasts=list(topic=contr.sum, sys=contr.sum))
rand(m1)

m1<-lmer(a3.w~pna+(1|species:pna)+(1|species),
         data=ps.psrare.pcoa)
car::Anova(m1,type="III",test.statistic="F",contrasts=list(topic=contr.sum, sys=contr.sum))
rand(m1)

## Permanova ##
dist.wu <- phyloseq::distance(psrare4, method="wunifrac")
md.psrare<-data.frame(sample_data(psrare4))
adonis(dist.wu ~ pna*species, data = md.psrare)
